# Supplementary material for: Development and validation of a LC-MS/MS method for the simultaneous determination of cycloicaritin and its carbamate prodrug in rat plasma: application to pharmacokinetic study
Source: Royal Society of Chemistry journal article supplement (doi:10.1039/d3nj04120d), 2023-01-01
Supplement: d3nj04120d1.pdf [file d3nj04120d1.pdf]

## Supporting information

**Development and validation of a LC-MS/MS method for the simultaneous determination of cycloicaritin and its carbamate prodrug in rat plasma: Application to pharmacokinetic study**

**Authors:**

Weiping Wang<sup>1</sup>, Fengxiao Li<sup>1</sup>, Jiaqi Fan<sup>1</sup>, Shuo Gan<sup>1</sup>, Jiaming Zhang<sup>1</sup>, Qikun Jiang<sup>1\*</sup>, Tianhong Zhang<sup>1\*</sup>

**Affiliation:**

<sup>1</sup> Wuya College of Innovation, Shenyang Pharmaceutical University, Shenyang 110016, PR China;

<sup>2</sup> State Key Laboratory of Natural and Biomimetic Drugs, Peking University, Beijing 100871, China.

**\*Correspondence:**

Prof. Tianhong Zhang and Prof. Qikun Jiang

No. 120 Mailbox, School of Pharmacy, Shenyang Pharmaceutical University, 103 Wenhua Road,  
Shenyang 110016, China

Tel/Fax: +86-24-23984159; +86-24-23986321

E-mail: zhangth1058@aliyun.com

**Table S1.** Recovery for analytes extracted by various extraction solvents

| liquid-liquid extraction<br>(LLE) | Extraction recovery (%), Mean $\pm$ SD) |                 |
|-----------------------------------|-----------------------------------------|-----------------|
|                                   | CICT                                    | 3-L             |
| methyl tert-butyl ether           | 73.4 $\pm$ 4.9                          | 61.3 $\pm$ 11.6 |
| n-hexane                          | 55.2 $\pm$ 4.9                          | 21.7 $\pm$ 0.4  |
| ethyl acetate                     | 52.5 $\pm$ 2.1                          | 40.0 $\pm$ 6.6  |
| dichloromethane                   | 74.3 $\pm$ 2.2                          | 26.2 $\pm$ 5.4  |

**Table S2.** Recovery for analytes extracted by various acidic solvents.

| liquid-liquid extraction<br>(LLE)                            | Extraction recovery (%), Mean $\pm$ SD) |                |
|--------------------------------------------------------------|-----------------------------------------|----------------|
|                                                              | CICT                                    | 3-L            |
| 0.01mol/L hydrochloric acid solution                         | 62.6 $\pm$ 8.4                          | 75.2 $\pm$ 3.3 |
| 1 mol/L hydrochloric acid solution                           | 85.5 $\pm$ 7.6                          | 87.6 $\pm$ 5.2 |
| pH 5.0 NH <sub>4</sub> H <sub>2</sub> PO <sub>4</sub> buffer | 38.0 $\pm$ 0.7                          | 65.4 $\pm$ 5.1 |

**Table S3.** Dilution integrity for assay of analytes in rat plasma (mean  $\pm$  SD, n=6).

| Analytes | Dilution<br>factors | Added(ng/mL) | Found (ng/mL)<br>Mean $\pm$ SD | Accuracy | Precision |
|----------|---------------------|--------------|--------------------------------|----------|-----------|
|          |                     |              |                                | RE (%)   | RSD (%)   |
| CICT     | 2.5                 | 3000.0       | 3167.8 $\pm$ 135.8             | 5.6      | 4.3       |
|          | 5                   | 3000.0       | 3080.6 $\pm$ 79.5              | 2.7      | 2.6       |
| 3-L      | 2.5                 | 3000.0       | 3122.5 $\pm$ 114.5             | 4.1      | 3.7       |
|          | 5                   | 3000.0       | 2988.3 $\pm$ 107.8             | -0.4     | 3.6       |

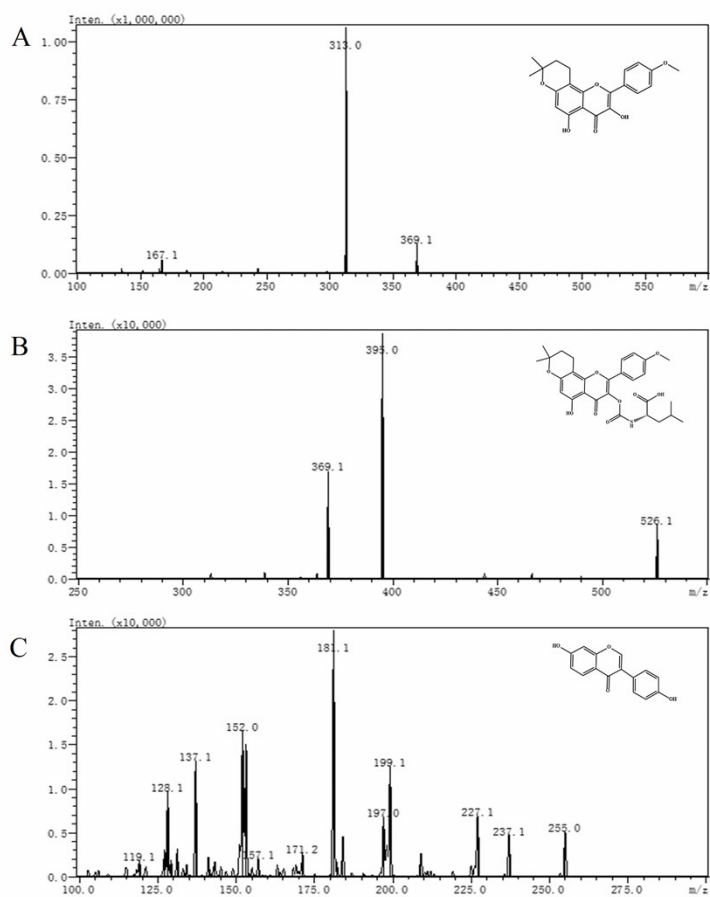

**Figure S1.** Product ion mass spectra of the  $[M+H]^+$  ions of cycloicaritin (A), 3-L (B) and DAN (C).
